# Supplementary material for: Caffeic Acid Phenethyl Ester-Incorporated Radio-Sensitive Nanoparticles of Phenylboronic Acid Pinacol Ester-Conjugated Hyaluronic Acid for Application in Radioprotection
Source: MDPI journal article supplement (doi:10.3390/ijms22126347), 2021-06-14
Supplement: s1 [file s1]

## Supporting materials

### Materials and methods

#### *Histological analysis*

Spleen tissues treated for TUNEL assay (TUNEL Assay kit-HRP-DAB (ab206386, Abcam, USA)) was used for capture of apoptotic cells ( $300\ \mu\text{m} \times 300\ \mu\text{m}$ ). In spleen tissue sections, ten areas were randomly captured and counted apoptotic cells (dark spot).

#### *Results*

As shown in Figure s1, ten areas ( $300\ \mu\text{m} \times 300\ \mu\text{m}$ ) in spleen tissues were randomly selected for analysis of apoptotic cells and then counted apoptotic cells (dark spot). Figure s2 shows the selected areas for analysis of apoptotic cells. As shown in figure s2, apoptotic cells were significantly decreased when CAPE or CAPE-incorporated nanoparticles were treated

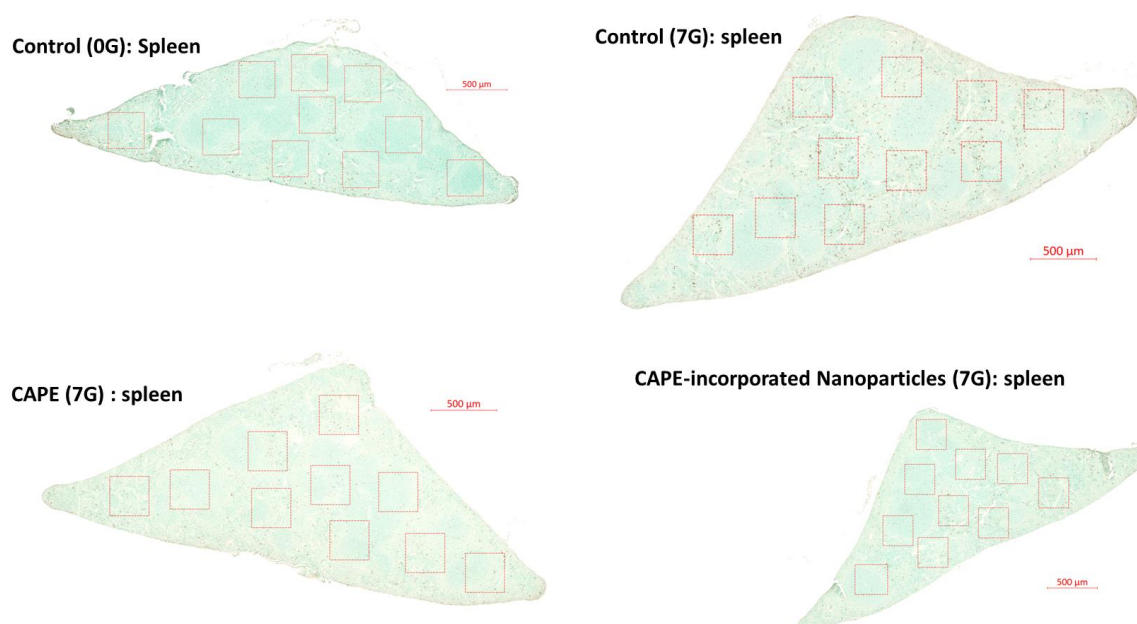

**Figure S1.** Spleen tissue sections for analysis of apoptotic cell death.

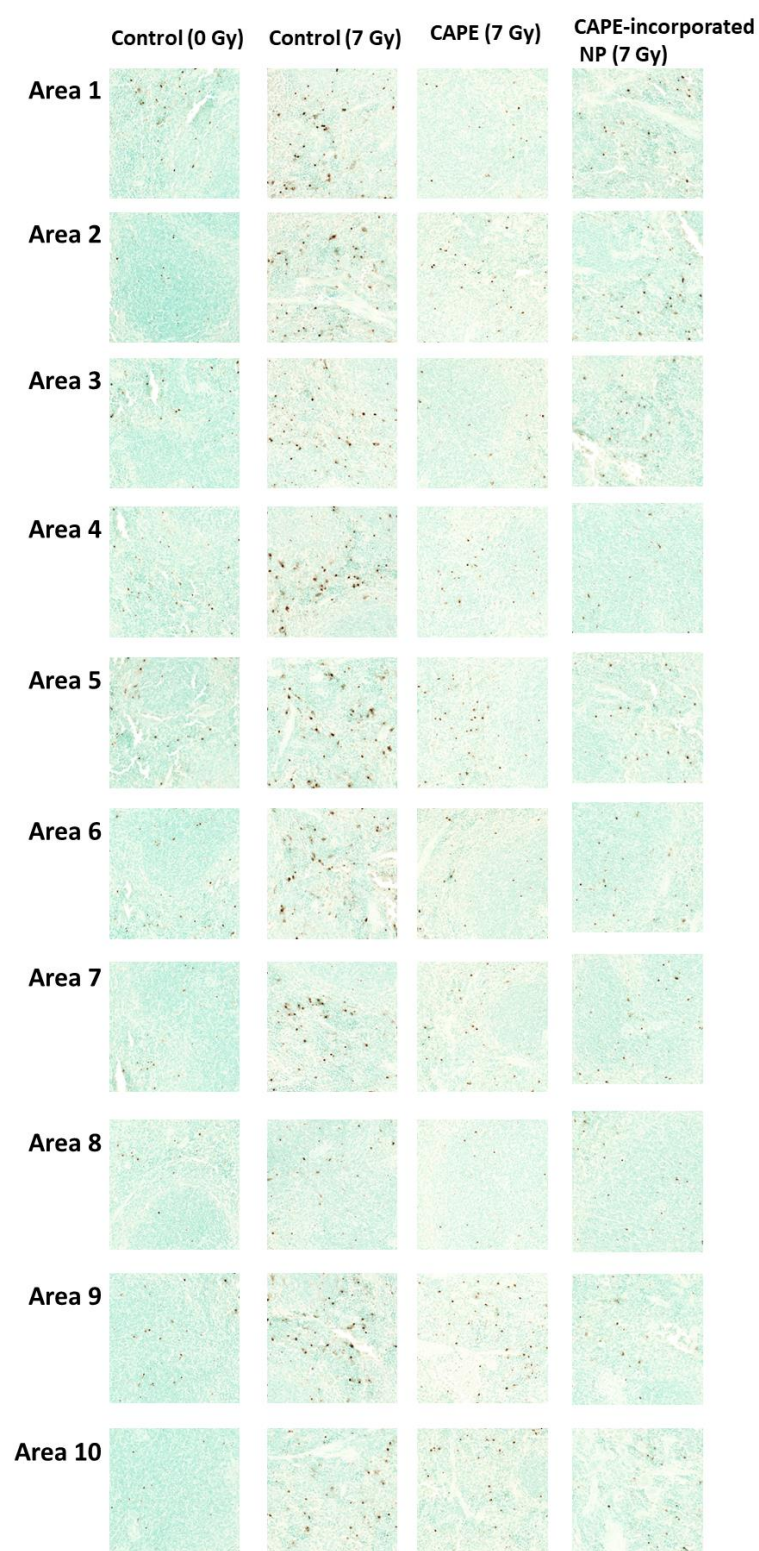

**Figure S2.** Ten areas for analysis of apoptotic cell death.
